# Supplementary material
Source: PubMed Central journal article supplement (PMC8195817)
Supplement: NIHMS1654593-supplement-1.pdf [file NIHMS1654593-supplement-1.pdf]

| <b>Supplemental Table 1. List of Abbreviations</b> |                                                                    |
|----------------------------------------------------|--------------------------------------------------------------------|
| ADMA                                               | asymmetrical dimethyl arginine                                     |
| AKI                                                | acute kidney injury                                                |
| B2M                                                | beta 2 microglobulin                                               |
| BTP                                                | beta trace protein                                                 |
| C <sub>D</sub>                                     | critical difference                                                |
| CG                                                 | Cockcroft-Gault                                                    |
| CKD                                                | chronic kidney disease                                             |
| CKD-EPI                                            | Chronic Kidney Disease Epidemiology Collaboration                  |
| CLU                                                | clusterin                                                          |
| CPN                                                | chronic progressive nephropathy                                    |
| CSF                                                | cerebrospinal fluid                                                |
| CysC                                               | cystatin-C                                                         |
| DIKI                                               | drug-induced kidney injury                                         |
| DKK3                                               | dikkopf 3                                                          |
| ELISA                                              | enzyme-linked immunosorbent assay                                  |
| ESRD                                               | end stage renal disease                                            |
| FDA                                                | Food and Drug Administration                                       |
| GFR                                                | glomerular filtration rate                                         |
| eGFR                                               | estimated glomerular filtration rate                               |
| mGFR                                               | measured glomerular filtration rate                                |
| GLP                                                | good laboratory practice                                           |
| GPI                                                | glycosylphosphatidylinositol                                       |
| KDIGO                                              | Kidney Disease: Improving Global Outcomes                          |
| KDOQI                                              | Kidney Disease Outcomes Quality Initiative                         |
| KIM-1                                              | kidney injury molecule 1                                           |
| LMW                                                | low molecular weight                                               |
| MDRD                                               | Modification of Diet in Renal Disease                              |
| NAG                                                | N-acetyl-beta-D-glucosaminidase                                    |
| NGAL                                               | neutrophil gelatinase-associated lipocalin                         |
| NTP                                                | National Toxicology Program                                        |
| OPN                                                | osteopontin                                                        |
| PGD2                                               | prostaglandin D2                                                   |
| RBP                                                | retinol binding protein                                            |
| RPGN                                               | rapidly progressive glomerulonephritis                             |
| SDMA                                               | symmetrical dimethyl arginine                                      |
| SDS-PAGE                                           | sodium dodecyl sulfate polyacrylamide gel electrophoresis          |
| TLR4                                               | toll-like receptor 4                                               |
| TRPM2                                              | transient receptor potential cation channel, subfamily M, member 2 |
| UACR                                               | urinary albumin to creatinine ratio                                |
| UMOD                                               | uromodulin                                                         |
| UN                                                 | urea nitrogen (previous known as blood urea nitrogen)              |
| UPCR                                               | urinary protein to creatinine ratio                                |
